# Supplementary material for: Two unique star-like [MnIVMnIII2LnIII] clusters: magnetic relaxation phenomena
Source: Royal Society of Chemistry journal article supplement (doi:10.1039/c6ra09066d), 2016-01-01
Supplement: c6ra09066d1.pdf [file c6ra09066d1.pdf]

## ELECTRONIC SUPPLEMENTARY INFORMATION

to

**Two unique star-like  $[\text{Mn}^{\text{IV}}\text{Mn}^{\text{III}}_2\text{Ln}^{\text{III}}]$  clusters: magnetic relaxation phenomena†**

Thomas G. Tziotzi,<sup>a</sup> Milosz Siczek,<sup>b</sup> Tadeusz Lis,<sup>b</sup> Ross Inglis\*,<sup>c</sup> and Constantinos J. Milios\*,<sup>a</sup>

<sup>a</sup> Department Of Chemistry, University of Crete, Voutes 71003, Herakleion, Greece.  
Fax: +30-2810-545001; Tel: +30-2810-545099; E-mail: [kamil@uoc.gr](mailto:kamil@uoc.gr)

<sup>b</sup> Faculty of Chemistry, University of Wroclaw, Joliot-Curie 14, Wroclaw 50-383, Poland.

<sup>c</sup> EaStCHEM School of Chemistry, The University of Edinburgh, David Brewster Road, EH9 3FJ, Edinburgh, UK. Email: [r.inglis@ed.ac.uk](mailto:r.inglis@ed.ac.uk)

## SYNTHETIC DETAILS

All manipulations were performed under aerobic conditions using materials (reagent grade) and solvents as received.

### *General synthetic strategy applicable to 1-2:*

Mn(ClO<sub>4</sub>)<sub>2</sub>·6H<sub>2</sub>O (120 mg, 0.33 mmol), Gd(NO<sub>3</sub>)<sub>3</sub>·6H<sub>2</sub>O (0.33 mmol, 149 mg), H<sub>3</sub>L<sup>2</sup> (90 mg, 0.33 mmol), NH<sub>4</sub>SCN (76 mg, 1 mmol), and NEt<sub>3</sub> (~ 1 mmol) were dissolved in MeOH (~ 30 mL) forming a yellow suspension that was left upon stirring for ~45' to yield a brown solution. The solution was then filtered and left undisturbed to evaporate at room temperature. Dark-brown single-crystals suitable for X-ray crystallography were formed (for the Gd analogue, **1**) after ~ 4 days in ~35% yield, and they were washed with Et<sub>2</sub>O (2 x 5 ml) and dried in air. Elemental Anal. calcd (found) for **1**: C 52.21 (52.32), H 4.49 (4.32), N 4.29 (4.18).

For **2**, the same exactly procedure was followed as in the case of **1**, with the use of Dy(NO<sub>3</sub>)<sub>3</sub>·6H<sub>2</sub>O (0.33 mmol, 150 mg) instead of Gd(NO<sub>3</sub>)<sub>3</sub>·6H<sub>2</sub>O. Dark-brown crystals were formed after ~ 4 days in ~30% yield, and they were washed with Et<sub>2</sub>O (2 x 5ml) and dried in air. Elemental Anal. calcd (found) for **2**: C 52.05 (52.12), H 4.48 (4.26), N 4.28 (4.16) %.

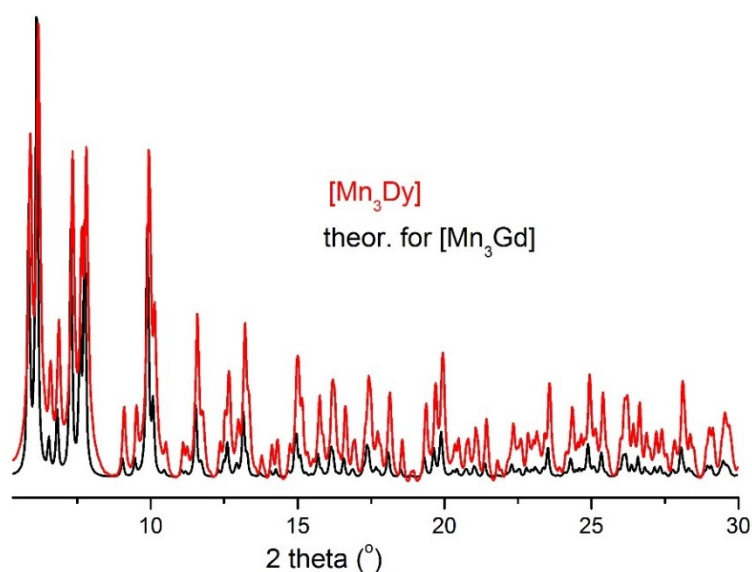

**Fig. S1** Experimental PXRD pattern for the Dy analogue (red) compared with the theoretical pXRD pattern of the Gd analogue (black).

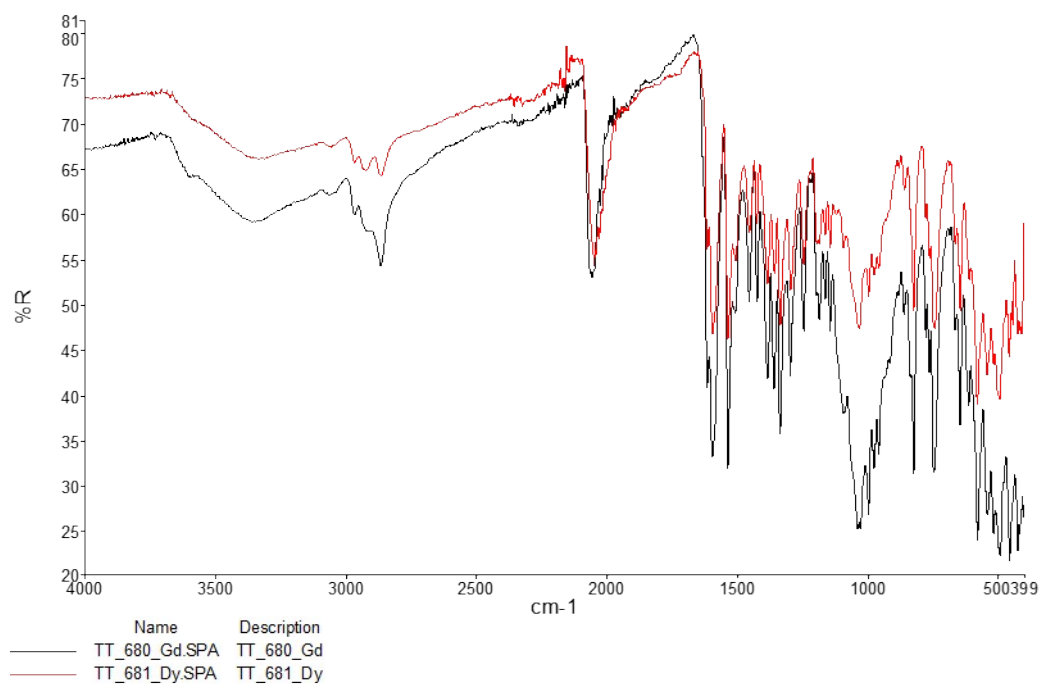

**Fig. S2** IR spectra comparison for the Dy (black line) and Gd (red line) analogues.

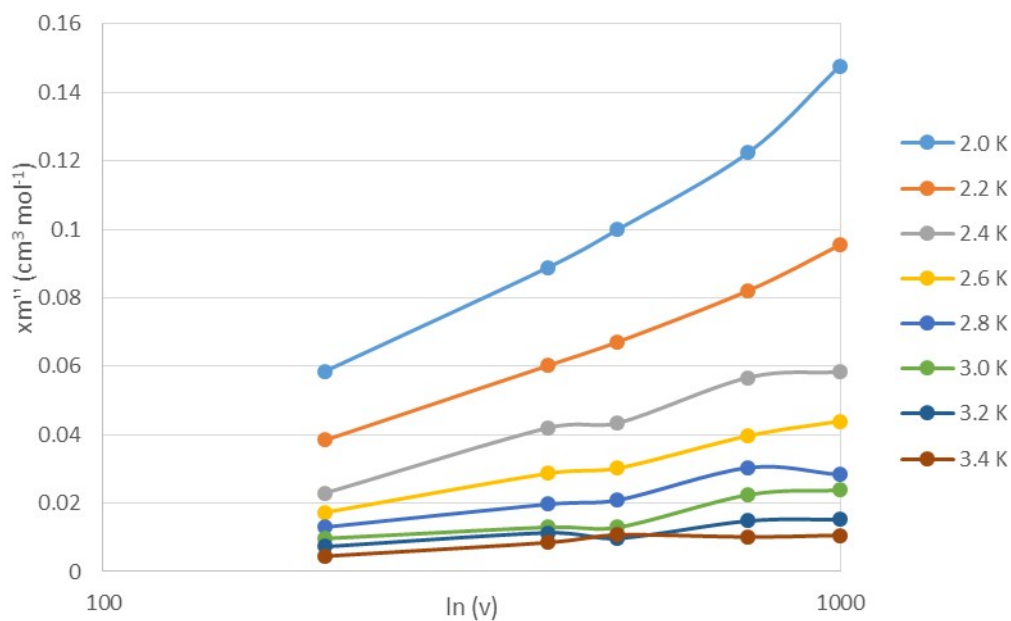

**Fig. S3** Plot of the out-of-phase  $\chi_M''$  signals vs.  $\ln(\nu)$  for complex **2** at the indicated temperatures

|               |                                           |              |
|---------------|-------------------------------------------|--------------|
| OP-8          | D8h Octagon                               | 28.898       |
| HPY-8         | C7v Heptagonal pyramid                    | 21.922       |
| HPY-8         | D6h Hexagonal bipyramid                   | 14.454       |
| CU-8          | Oh Cube                                   | 8.926        |
| <b>SAPR-8</b> | <b>D4d Square antiprism</b>               | <b>1.510</b> |
| TDD-8         | D2d Triangular dodecahedron               | 1.744        |
| JGBF-8        | D2d Triangular dodecahedron               | 14.422       |
| J14           | -                                         | 24.322       |
| JBTPR-8       | C2v <u>Biaugmented trigonal prism</u> J50 | 2.577        |

**Table S1.** SHAPE analysis of the lanthanide center in complex **1**.
